# Supplementary material
Source: PubMed Central journal article supplement (PMC544500)
Supplement: plntcell_tpc.104.028282_2.pdf [file plntcell_tpc.104.028282_2.pdf]

**Supplemental Figure 2. Aligement of regions of chromosomes 5, 1 and 4 comprising At5g58260 (A), At1g74880 (B) and At4g37920 (C), respectively and corresponding cDNA sequences.** Upper line shows the genomic sequences retrieved from *Arabidopsis* information resource (TAIR, <http://www.arabidopsis.org>, September 2004, Rhee *et al*, 2003); in red, untranslated regions; in blue and capital, exons; in blue and small letters, introns. Second line (capital, black, underlined) shows the full length cDNA sequences (RAFL, Seki *et al*, 2002) retrieved from Riken BioResource Center database (<http://www.brc.riken.jp/lab/epd/catalog/cdnaclone.html>, September 2004), modified nucleotides are indicated in italics. Third line (black and capital letters) shows amino acid sequences deduced from cDNA sequences. Dotted lines indicated that sequences were contiguous. RAFL04-10-E22 and RAFL06-16-D17 perfectly matches At5g58260 and At1g74880 annotations. At4g37920 predicted sequence corresponds to two RAFL cDNA clones (RAFL09-82-J05 and RAFL15-26-D09) indicating that At4g37920 must be split into two genes At4g37920 and At4g37925 as proposed by the Riken BioResource Center and MIPS *Arabidopsis thaliana* database (MATDB, <http://mips.gsf.de/proj/thal/db/index.html>, September 2004.) RAFL09-82-J05 is truncated at the 5' end. A PCR reaction performed with a primer encompassing the ATG codon located 56 base pairs upstream the ATG codon at the 5' end of RAFL09-82-J05 and another primer located in the midle of RAFL09-82-J05 using cDNA synthesized from *Arabidopsis* RNA as template lead to the amplification of the expected fragment, demonstrating that this sequence is included in the RNA (data not shown). Aligement between the genomic sequence of At4g37925 and RAFL09-82-J05 also revealed the misannotation of an exon (amino acid sequence between brackets).

Supplemental Figure 2

A

At5g58260 (TAIR):  
RAFL04-10-E22 (RIKEN BRC):

gtagtaagaaATGGGAAGCCGTGCAATATGTATACAACGTGTGGCACCACCGTGTGTTTGAAGCCT  
AGTAAAGAAATGGGAAGCCGTGCAATATGTATACAACGTGTGGCACCACCGTGTGTTTGAAGCCT  
M G S R A I C I Q R V A P P C F E A

CGCAAGTGAAGAAGATCAAAACAGTTGGTTCCTTTTTGGTGAATACTAGGAGTAAGAGAAGAAGAAGCACTGGTGTGAAATGTAGCAGCATAGCTGACTA  
CGCAAGTGAAGAAGATCAAAACAGTTGGTTCCTTTTTGGTGAATACTAGGAGTAAGAGAAGAAGAAGCACTGGTGTGAAATGTAGCAGCATAGCTGACTA  
S Q V K K I K T V G S F L V N T R S K R R R S T G V K C S S I A D Y

CATCGGAGGTGACTTGGTGAAGCCGGACATCGGACAATGGCTTCAAGACGTGGAAGAACACAAGGCAATCGCCATTTACGCTCCTCATGAGGGTGGTTAC  
CATCGGAGGTGACTTGGTGAAGCCGGACATCGGACAATGGCTTCAAGACGTGGAAGAACACAAGGCAATCGCCATTTACGCTCCTCATGAGGGTGGTTAC  
I G G D L V K P D I G Q W L Q D V E E H K A I A I Y A P H E G G Y

GAAGGTCGTTATCTTAACCGTCTCAAAATGCAGGGCTACTACTTTCTTGACATCTCTGCTCGTGGCCTTGGTGACCCTGAGACTACCCCTTCTCAAGAACT  
GAAGGTCGTTATCTTAACCGTCTCAAAATGCAGGGCTACTACTTTCTTGACATCTCTGCTCGTGGCCTTGGTGACCCTGAGACTACCCCTTCTCAAGAACT  
E G R Y L N R L K M Q G Y Y F L D I S A R G L G D P E T T L L K N

ACCCTGTTTGCCTgtatgtctactttcatccatcttctactttaatcttgtttcaatataatttgtgtgaaccatgtatcttctctcttttagGCTC  
ACCCTGTTTGCCT..... GCTC  
Y P V C P..... A

ATCTTGGGAAACAACCTATAGCAAGATGGTATTATCCACCAGAAGTTGATTACAGGCTCGTCTCTTCCCCCTAGTGCCAAGGGTCTTGTGTATGGGT  
ATCTTGGGAAACAACCTATAGCAAGATGGTATTATCCACCAGAAGTTGATTACAGGCTCGTCTCTTCCCCCTAGTGCCAAGGGTCTTGTGTATGGGT  
H L G K Q P I A R W Y Y P P E V D Y R L A A L P P S A K G L V V W V

CCTCGAAGCAAAGgtttgagtttctctcatttgatctgttctcccacatgctctttctcatatttccatttcaactcagGTCCTCTCAAAATCGGAGCTTC  
CCTCGAAGCAAAG.....GTCCTCTCAAAATCGGAGCTTC  
L E A K..... V L S K S E L

AATTTCTCGCTTTACTTCCCTCTCTTCGTCCTAACGTCAGGGTTATTGCTGAATGTGGCAACTGgtgagtataatccttaccatacacactaatcat  
AATTTCTCGCTTTACTTCCCTCTCTTCGTCCTAACGTCAGGGTTATTGCTGAATGTGGCAACTG.....  
Q F L A L L P S L R P N V R V I A E C G N W.....

ctatgtttgcaatttgcatgaccattaccaattcccctgcagGAGAAAGTTCGTGTGGAAGCCTCTAGCAGAAATGCAAATCTAGCTGCACAAGAGTAA  
.....GAGAAAGTTCGTGTGGAAGCCTCTAGCAGAAATGCAAATCTAGCTGCACAAGAGTAA  
..... R K F V W K P L A E I A N L A A Q E \*

cttaatggcacaagtgagctaccagtgatagttttcatgaatgcatctcccgaagtgtagcaatactcatcccatagtaaaagttaaaatctgtat  
CTTAATGGCACAAGTGGAGCTACCAGTGTATAGTTTTTCATGAATGCATCTCCCGAAGTGTAGCAATACTCATCCCATAGTAAAAGTTAAAATCTGTAT

ttgtaacttggtagtagtatattccatggagtagttaagataatcttgactctgctttgtcacaataaaaagtagtataatcagtaagattgataggac  
TTGTAACCTGGTAGTATATCCCATGGAGTAGTTAAAGATAATTTCTGACTCTGCTTTGTACAAAATAAAAGTATGTATAATCAGTAAGATTGGAAAAAA

AAAAAAAAAA

B

At1g74880 (TAIR) :  
RAFL06-16-D17 (RIKEN BRC) :

gcggtcttatcccgaaactccaagaacacataattt  
GCGGTCTTATCCCGAAACTCCAAGAACACATAATTT

tttcttggtggtctctccaATCGCTTTCTCTGCGACTGTGTCTCAGCTTTCTTCTCTTTCAACCATCTCCTCTTCATTACCAATTTCTTCTAGAAGACTC  
TTTCTTGGTGGTCTCTCCAATCGCTTTCTCTGCGACTGTGTCTCAGCTTTCTTCTCTTTCAACCATCTCCTCTTCATTACCAATTTCTTCTAGAAGACTC  
M A F S A T V S Q L S S L S T I S S S L P I S S R R L

CCTCATCGATCTCTTCTCAATTCACAGTCAAAGCAGAAGCAGAGAAAAGAGAAACAGAGCACACAGGGCAAGTCTGATGGGGAAGCATCACCAGCTGCAA  
CCTCATCGATCTCTTCTCAATTCACAGTCAAAGCAGAAGCAGAGAAAAGAGAAACAGAGCACACAGGGCAAGTCTGATGGGGAAGCATCACCAGCTGCAA  
P H R S L P Q F T V K A E A E K E K Q S T Q G K S D G E A S P A A

CCAAACCCCTAAAACCCCTCCCAAGAAACCGGTTTACTCGAgctctgttcctcacttttgtttctaagtgttgatccaataacagatttttgataatt  
CCAAACCCCTAAAACCCCTCCCAAGAAACCGGTTTACTCGA.....TGAAGAAGGGCCAAATCGTTCGTGTGAAAAAGAGAAGTACCTCAACAGCATCAATgtatagtc  
T K T P K T L P K K P V Y S.....M K K G Q I V R V E K E K Y L N S I N.....

cttttgatctctgtttctggtggatgagaaaacagTGAAGAAGGGCCAAATCGTTCGTGTGAAAAAGAGAAGTACCTCAACAGCATCAATgtatagtc  
.....TGAAGAAGGGCCAAATCGTTCGTGTGAAAAAGAGAAGTACCTCAACAGCATCAAT.....  
.....M K K G Q I V R V E K E K Y L N S I N.....

gaaatcttccagttttgaagctgcttctcaaaaatctgtttctgaaacttttgtttgctacattgttgaaattacagTACTTATCAGTTGGACAT  
.....TACTTATCAGTTGGACAT.....  
.....Y L S V G H.....

CCTCCTTTCTACAAAGGACTTGATTACATATACGAAGATCGCGGCGAGgtataacacaatccctttgaaaataaatcacaagagatttcaagcttattg  
CCTCCTTTCTACAAAGGACTTGATTACATATACGAAGATCGCGGCGAG.....  
P P F Y K G L D Y I Y E D R G E.....

aaaagtaataaatacttgagGTCCTTGGACCTTCGTGTCTTTGAGACAGGAGAGTATGCACCTTgtaagtcagctccacacaaaattgtttattctggt  
.....GTCTTGGACCTTCGTGTCTTTGAGACAGGAGAGTATGCACCTT.....  
.....V L D L R V F E T G E Y A L.....

tcataagatgagctaatggattgtgaattttggagacttttagGTTGGATGGGTTGGTATCCCCACCGCACCAGCTTGGCTCCCAACAGATATGCTCATCA  
.....GTTGGATGGGTTGGTATCCCCACCGCACCAGCTTGGCTCCCAACAGATATGCTCATCA  
.....V G W V G I P T A P A W L P T D M L I.....

AggtactcataatcttctcagtacatcaacaatacgtagcattgtcttgatgtcaagtcagattgtttctgtgttcttggttttgttccaccgagTG  
AG.....TG  
K.....C

TGAGAACTTGTTTACGAGCGAATGTAGagtcagaagggtccaagaagaatcctttggaatgcaactgatataccaaggattgtgtaagctgagatga  
TGAGAACTTGTTTACGAGCGAATGTAGAGTCAAGAAGGTTCCAAGAAGAATCCTTTGGAATGCAACTGATATACCAAGGATTGTGTTAAGCTGAGATGA  
E K L V Y E R M \*

Acgataacaatggcgcaccatcatgatcatgtgttcaagagtttgacaaagatcaacgttacaattagttacaaaaactggttgaggagtgtggaatag  
ACGATAACAATGGCGCACCATCATGATCATGTGTTCAAGAGTTTGACAAAAGTATCAACGTTACAATTAGTTACAAAACTGTTGTGGAGTGTGGAATATG

Tcatcagactcctataataagaatgcagcttcagtaaacggatgatggttaattttatctcatcgatctccaacataaactcatttctcacagcttcatag  
TCATCGGACTCCTATAATAAGAATGCAGCTTCAGG

C

At4g37925 acagaaaaATGGTTGCAGCATTCTCTTACACTGCCTGCACCAAGCTTTCTCTATTACATCCTTCTATGGTTGCTCAAATCCGACCAA  
RAFL09-82-J05 CATCCTTCTATGGTTGCTCAAATCCGACCAA

M V A A F S Y T A C T K L S L L H P S M V A Q I R P

GAACAACACAAAAGGCGTTCGTGGTGACAAATCCGGAACAAGACAGTACTCTTGAAGTACAAGAAAAGAGACTCAAAGAAGAGCAATCAACAGAGAA  
GAACAACACAAAAGGCGTTCGTGGTGACAAATCCGGAACAAGACAGTACTCTTGAAGTACAAGAAAAGAGACTCAAAGAAGAGCAATCAACAGAGAA  
R T T Q K A F V V T N P E Q D S T L E V Q E T E T L K E E Q S T E K

GATGAAGAAGCAGCCAACACCATTGAGACCAGTGGAGAAAACAGCTGAACGTGAAGAGCAAGGGTATGGGCGATTTTGGTGGTCACTGGCTAAGCAGTGT  
GATGAAGAAGCAGCCAACACCATTGAGACCAGTGGAGAAAACAGCTGAACGTGAAGAGCAAGGGTATGGGCGATTTTGGTGGTCACTGGCTAAGCAGTGT  
M K K Q P T P L R P V E K Q L N V K S K G M G D F G G Q W L S S V

ACACGTCACGTTAGGATCTACGCTGCTTATATTTGATCCAGAGACTTGTGAGTTTGACCAGTCACAAATGGATAAACTCACTTTGATTTCTGATCCTACTG  
ACACGTCACGTTAGGATCTACCTGCTTATATTTGATCCAGAGACTTGTGAGTTTGACCAGTCACAAATGGATAAACTCACTTTGATTTCTGATCCTACTG  
T R H V R I Y A A Y I D P E T C E F D Q S Q M D K L T L I L D P T

AAGAATTTGTGTGGGATGATGAAAGCTGTAACAAGGTCTATTCTTATTTCCAAGAACTCGTCGATCACTACGAGGTAACGATAACAATAAACGAACGAAA  
AAGAATTTGTGTGGGATGATGAAAGCTGTAACAAGGTCTATTCTTATTTCCAAGAACTCNTCGATCACTACGAG .....  
E E F V W D D E S C N K V Y S Y F Q E L V D H Y E [V T I T I N E R N

CATTCATCTAAAAGTTAGACTCATTCAAGAAGACCTTATAATATTGTTTTTGAACAGGGAGCACCATTAACGGAGTACACATTGAGATTGATAGGATCG  
..... GGAGCACCATTAACGGAGTACACATTGAGATTGATAGGATCG  
I H L K V R L I S R R P Y N I V F E Q] G A P L T E Y T L R L I G S

GACGTAGAACATTACATAAGGAAGATGTTGTTTCGATGGAGAAATACAATACAATATGGATGCAAGAGTTCTTAATTTTCAGTATGGGAAAGCCTCGTGTAC  
GACGTAGAACATTACATAAGGAAGATGTTGTTTCGATGGAGAAATACAATACAATATGGATGCAAGAGTTCTTAATTTTCAGTATGGGAAAGCCTCGTGTAC  
D V E H Y I R K M L F D G E I Q Y N M D A R V L N F S M G K P R V

AATTCAATACCAGTAACATTGAAGGTGGTGGAGATGgtcagcctcaagaggacgcttagtgaacaaactctattttataatcatgtaatgggaataata  
AATTCAATACCAGTAACATTGAAGGTGGTGGAGATGGTCAGCCTCAAGAGGACGCTTAGTGAACAAACTCTATTTTATAATCATGTAATGGGAATATA  
Q F N T S N I E G G G D G Q P Q E D A \*

atatattgtagtatgcttttttaattttgtctatcacaaagtaacatagtatatatcatgacatatgctataattatttttgaataatcaatcttaagt  
ATATATTGATGATGCTTTTAAATTTGTCTATCACAAAGTAACATATGTATATATCATGACATATGCTATAAATATTTTGTAAATCAATCTTAAGT

ttctttgtctttttctgttaaatgtaaggtcttaaggtcatgtgaatgtaatgtcaagaaactcaattctggtcttgctcattcatgttccttactcc  
TTCTTTGTCTT

ttgcctcttttttaaaaagatttcaaaactgatgcaaaactgttagtthtaacatttttaccacaaaagttatattaagtttttgaatttgtcaacgttta

At4g37920  
ctaattattacaattaaaaccctgttcttcttatacctctggtgtttctcgttgttcgctaccaagACGAACCTTTGTGAGGGAGAAAAATGGCGAATTT  
RAFL15-26-D09 ATCCTCTGGTGTCTCTCGTTGTTTCGTACCAAGACGAACCTTTGTGAGGGAGAAAAATGGCGAATTT  
M A N L

ACTGGAACATCAATCTTTTCTCCTCTGCTGATAAATTACTGTCTTTCCCGCCTAAGAATTCTCAAACCCATCATCTCCCTTTCTCTGCTTTTCATCAAT  
ACTGGAACATCAATCTTTTCTCCTCTGCTGATAAATTACTGTCTTTCCCGCCTAAGAATTCTCAAACCCATCATCTCCCTTTCTCTGCTTTTCATCAAT  
L E T S I F F S S A D K L L S F P P K N S Q T H H L P F S A F I N

GGAGGAAGAAAAGATACGCAAAAGCTCAACTATCACCTTTGCTACCGACTGTCACTTACAATGGCACTACAAGtaagctcataaacctaaatctctaa  
GGAGGAAGAAAAGATACGCAAAAGCTCAACTATCACCTTTGCTACCGACTGTCACTTACAATGGCACTACAA .....  
G G R K I R K S S T I T F A T D T V T Y N G T T

tctttctgtctaattaccaataaattctatttcttttagattccaatttgtatttaattgtcaccattagataagctaaacccttttcatagactaggattc  
.....

gtctagttagagaagctttttttattgaagatagaaattttgtgttttagGTGCGGAAGTAAAAAGCTCTGTTGAGGATCCAATGGAAGTTGAGGTTGCTG  
..... GTGCGGAAGTAAAAAGCTCTGTTGAGGATCCAATGGAAGTTGAGGTTGCTG  
..... S A E V K S S V E D P M E V E V A

AAGGTTACACTATGGCTCAGTTTTGTGACAAGATTATTGATCTCTTCTTGAATGAGAAACCTAAAGTTAAACAATGGAAGACGTATTTGGTTTTAAGAGA  
AAGGTTACACTATGGCTCAGTTTTGTGACAAGATTATTGATCTCTTCTTGAATGAGAAACCTAAAGTTAAACAATGGAAGACGTATTTGGTTTTAAGAGA  
E G Y T M A Q F C D K I I D L F L N E K P K V K Q W K T Y L V L R D

TGAATGGAACAAGTACAGTGTAAATTTCTATAAGCGTTGCAGAATCCGAGCTGATACCGAAACTGATCCTATATTGAAGCAGAACTGGTATCTTTGAA  
TGAATGGAACAAGTACAGTGTAAATTTCTATAAGCGTTGCAGAATCCGAGCTGATACCGAAACTGATCCTATATTGAAGCAGAACTGGTATCTTTGAA

E W N K Y S V N F Y K R C R I R A D T E T D P I L K Q K L V S L E

AGTAAAGTCAAGAAGgtatttatagtggttattttgtgtttatttagtgaactcaggtagtttattgttgttgtgtgacttataggagtgagtattg  
AGTAAAGTCAAGAAG

S K V K K

ttgcagATAGATAAGGAAATGGAGAAACACAATGACCTTTTGAAGGAGATTCAAGAAAACCCAACAGACATAAACGCAATCGCTGCCAAGAGACGCAGAG  
ATAGATAAGGAAATGGAGAAACACAATGACCTTTTGAAGGAGATTCAAGAAAACCCAACAGACATAAACGCAATCGCTGCCAAGAGACGCAGAG

I D K E M E K H N D L L K E I Q E N P T D I N A I A A K R R R

ACTTTACGGGAGAGTTTTTCCGCTATGTTACTTTGTTATCAGAAACTCTTGATGGCTTGAAGACCGAGATGgtacttaaacattaatcatgttgctta  
ACTTTACGGGAGAGTTTTTCCGCTATGTTACTTTGTTATCAGAAACTCTTGATGGCTTGAAGACCGAGATG

D F T G E F F R Y V T L L S E T L D G L E D R D

cttattgattcccacagtttcatgattggtttgttatttttgagcagCTGTTGCGAGGCTTGCAACTAGATGTTTATCTGCTGTGAGTGCTTATGACAAC  
CTGTTGCGAGGCTTGCAACTAGATGTTTATCTGCTGTGAGTGCTTATGACAAC

A V A R L A T R C L S A V S A Y D N

ACGTTGGAGAGTGTGAGACTCTAGATACTGCTCAAGCAAAGTTTGAAGATATTTAAACTCTCCATCCGTTGGATTCTGCTTGCAAAAGATCAGAAGTT  
ACGTTGGAGAGTGTGAGACTCTAGATACTGCTCAAGCAAAGTTTGAAGATATTTAAACTCTCCATCCGTTGGATTCTGCTTGCAAAAGATCAGAAGTT

T L E S V E T L D T A Q A K F E D I L N T L E S V E T L D T A Q A

TAGCCAAGGCAAAGGAGCTTGATTCTCATTGATCTTATTGATCAACAGTGCATACGCTGCTGCAAAAGAGTCTCAAAGTATTACGAACGAGgtaaatagc  
TAGCCAAGGCAAAGGAGCTTGATTCTCATTGATCTTATTGATCAACAGTGCATACGCTGCTGCAAAAGAGTCTCAAAGTATTACGAACGAG

K F E D I L N D S S L I L L I N S A Y A A A K E S Q T V T N E

cattggattacaatcttctttaatattcttcacaatcttctcaaatcgatatcgattttttgaacagGCTAAAGACATAATGTATCATTTATACAAAGC  
GCTAAAGACATAATGTATCATTTATACAAAGC

GCTAAAGACATAATGTATCATTTATACAAAGC

A K D I M Y H L Y K A

TACAAAGAGCAGTCTTAGAAGCATCACACCGAAAGAGATCAAAGTCTTTAAAGTACTTACTCAACATAACAGACCCCGAAGAACGATTCTCTGCCCTAGCT  
TACAAAGAGCAGTCTTAGAAGCATCACACCGAAAGAGATCAAAGTCTTTAAAGTACTTACTCAACATAACAGACCCCGAAGAACGATTCTCTGCCCTAGCT

T K S S L R S I T P K E I K L L K Y L L N I T D P E E R F S A L A

ACAGCATTCTCTCCTGGTGATGACCACGAAGCTAAGGACCTAAAGCATTATACACgtaagtaacataaagatgcacactttagtgtttcatctttaacc  
ACAGCATTCTCTCCTGGTGATGACCACGAAGCTAAGGACCTAAAGCATTATACAC

T A F S P G D D H E A K D P K A L Y T

acaaccattgattctaaccaagctgatgacacagGACGCCAAAGGAGCTGCATAAGTGGATAAAAGATAATGCTTGATGCTTACCATCTCAACAAAGAAGA  
GACGCCAGAGGAGCTGCATAAGTGGATAAAAGATAATGCTTGATGCTTACCATCTCAACAAAGAAGA

GACGCCAGAGGAGCTGCATAAGTGGATAAAAGATAATGCTTGATGCTTACCATCTCAACAAAGAAGA

T P K E L H K W I K I M L D A Y H L N K E E

AACAGACATTAAGAAGCTAAACAGATGAGCCAACCTATCGTTATTTCAGCGGCTTTTCATTCTCAAGGACACTATCGAAGACGAGTATTTAGACAAGAAA  
AACAGACATTAAGAAGCTAAACAGATGAGCCAACCTATCGTTATTTCAGCGGCTTTTCATTCTCAAGGACACTATCGAAGACGAGTATTTAGACAAGAAA

T D I K E A K Q M S Q P I V I Q R L F I L K D T I E D E Y L D K K

ACAATCGTGGCTGATGAAACTCCAAAGAAGGAAGAAGATACGACTATTGAAGATTTTTTGAAGTGAaaattgtgaaatccatgaacacactctgttt  
ACAATCGTGGCTGATGAAACTCCAAAGAAGGAAGAAGATACGACTATTGAAGATTTTTTGAAGTGAaaattgtgaaatccatgaacacactctgttt

T I V A D E T P K K E E E D T T I E D F L N .

acaattagctaccttttatgtaaatggggaaaagagtaattttgtagaattctcagctataattgcaattacgactaaatgtgaggtctaatttgaattaa  
ACAATTAGTACCTTTTATGTAATGGGGAAAAGAGTAATTTTGTAGCAAAAAAAAAAAAAA

TGA

CA
